# Supplementary material for: Endogenous antisense walR RNA modulates biofilm organization and pathogenicity of Enterococcus faecalis
Source: PubMed Central journal article supplement — Exp Ther Med. 2020 Nov 23;21(1):69. doi: 10.3892/etm.2020.9501 (PMC7716642; doi:10.3892/etm.2020.9501), 2020-11-23
Supplement: Supplementary_Data.pdf [file Supplementary_Data.pdf]

Figure S1. RNA agarose gel electrophoresis for northern blotting. Lane M, DL2000 Plus DNA marker; lane 1, total RNA of *walR* antisense RNA; lane 2, total RNA of *walR*+; lane 3, total RNA of V583.

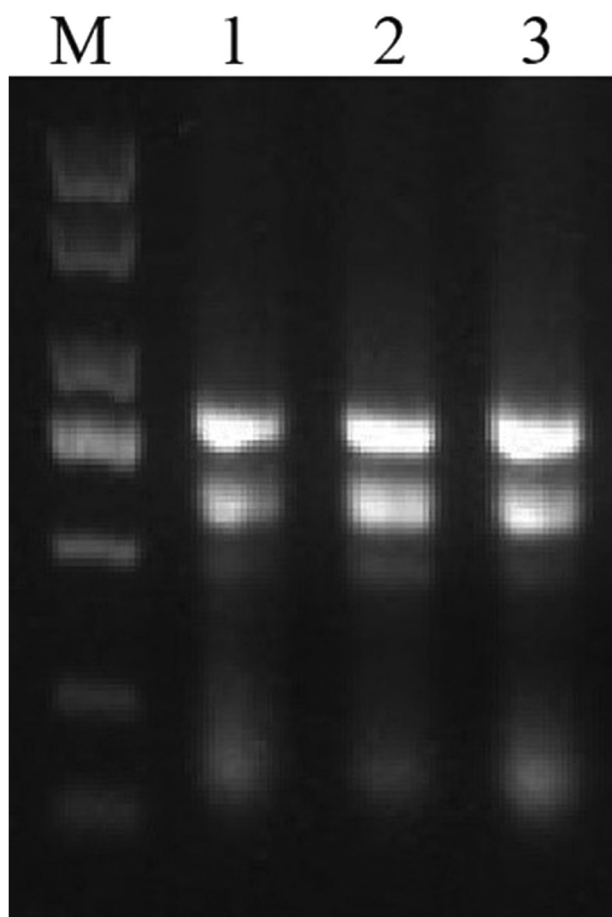

Table SI. Bacterial strains and plasmids used in the present study.

| A, Strain                                                                                                                      | Relevant characteristics and purpose                      | Source            |
|--------------------------------------------------------------------------------------------------------------------------------|-----------------------------------------------------------|-------------------|
| <i>E. faecalis</i>                                                                                                             |                                                           |                   |
| <i>E. faecalis</i> V583                                                                                                        | Spec <sup>s</sup>                                         | ATCC              |
| AS <i>walR</i>                                                                                                                 | pDL278 (Spec <sup>r</sup> )                               | The present study |
| walR+                                                                                                                          | pDL278 (Spec <sup>r</sup> )                               | The present study |
| B, Plasmid                                                                                                                     | Relevant characteristics and purpose                      | Source            |
| pDL278                                                                                                                         | (Spec <sup>r</sup> ) Vector for recombinant generating    | Novagen           |
| pDL278ASwalR                                                                                                                   | (Spec <sup>r</sup> ) Vector for AS <i>walR</i> expression |                   |
| pDL278 <i>walR</i>                                                                                                             | (Spec <sup>r</sup> ) Vector for <i>walR</i> expression    | The present study |
| <i>E. faecalis</i> , <i>Enterococcus faecalis</i> ; ASwalR, <i>walR</i> antisense RNA; ATCC, American Type Culture Collection. |                                                           |                   |

Table SII. Oligonucleotide primers used for RT-qPCR.

| Primer      | Sequence                                                         | Source                      |
|-------------|------------------------------------------------------------------|-----------------------------|
| <i>16s</i>  | F: 5'-AGCAACGCGAAGAACCTTAC-3'<br>R: 5'-ATTTGACGTCATCCCCACCT-3'   | Sangon Biotech Co., Ltd.    |
| <i>ace</i>  | F: 5'-GGCGACTCAACGTTTGAC-3'<br>R: 5'-TCCAGCCAAATCGCCTAC-3'       | Sangon Biotech Co., Ltd.    |
| <i>gelE</i> | F: 5'-GGAACAGACTGCCGGTTTAG-3'<br>R: 5'-TTCTGGATTAGATGCACCCG-3'   | Sangon Biotech Co., Ltd.    |
| <i>esp</i>  | F: 5'-GGAACGCCTTGGTATGCTAAC-3'<br>R: 5'-GCCACTTTATCAGCCTGAACC-3' | Sangon Biotech Co., Ltd.    |
| <i>walR</i> | F: 5'-CATGGTCTCAAAACGGGGTG-3'<br>R: 5'-AATAACCAACCCACGACGA-3'    | Sangon Biotech Co., Ltd.    |
| <i>walK</i> | F: 5'-CGCGTGTATGTGAATGTCCA-3'<br>R: 5'-GCTTCGTGATTGATCGTGCA-3'   | Sangon Biotech Co., Ltd.    |
| <i>epal</i> | F: 5'-AGGCCAAGTATGCTGGTTCA-3'<br>R: 5'-AGAACCAAGGTACCATCCCT-3'   | Sangon Biotech Co., Ltd.    |
| <i>epaA</i> | F: 5'-GCCTATGATGCACCAGGAGA-3'<br>R: 5'-CAACCATTCCACCAGCCAAA-3'   | Sangon Biotech Co., Ltd.    |
| PCR1        | 5'-ATGGTGACTGCCAAAGATTCT-3'                                      | First strand cDNA synthesis |
| AS2         | 5'-CGGCTTCTTTCGCATTGGTT-3'                                       | RT-qPCR analysis            |

F, forward; R, reverse; RT-qPCR, reverse transcription-quantitative PCR; PCR1, gene-specific primer for first strand cDNA synthesis; AS2 gene-specific primer for RT-qPCR analysis.

Table SIII. Oligonucleotide primers used for reverse transcription-PCR of the WalR regulon.

| Primers | Sequence                         | Source or reference |
|---------|----------------------------------|---------------------|
| 34F     | 5'-ATTCATCCTGATGCATACATGGTC-3'   | The present study   |
| 34R     | 5'-CTGCGTACTTAACGTGTTTGAC-3'     | The present study   |
| 45F     | 5'-GATACAGACAAAGTAATTCAGG-3'     | The present study   |
| 45R     | 5'-CCATTTGGTTGTAGCGCTTAAGTTGC-3' | The present study   |
| 56F     | 5'-GTGGATATTCGCATCACGAACAAC-3'   | The present study   |
| 56R     | 5'-AAAGTATTATCCGCAATTTGCAGCC-3'  | The present study   |
| 67F     | 5'-ATGCGATAGACACGCTCTATAT-3'     | The present study   |
| 67R     | 5'-AATCATGGGATCCATCGCTTGCCACG-3' | The present study   |

F, forward; R, reverse.

Table SIV. Oligonucleotide primers used for 5'-RACE

| A, Antisense RNA detection  |                                                         |                                                              |
|-----------------------------|---------------------------------------------------------|--------------------------------------------------------------|
| Primers                     | Sequence                                                | Source or reference                                          |
| PCREf                       | 5'-GCTTATGATGGAGAAGAAGCACTT-3'                          | First strand cDNA synthesis                                  |
| ASEf                        | 5'-TACGGTTACGTCCACTGTCCGCA-3'                           | RT-PCR detection                                             |
| B, 5'-RACE                  |                                                         |                                                              |
| 5'-RACE adapter             | 5'-GCUGAUGGCGAUGAAUGAAC<br>ACUGCGUUUGCUGGCUUUGAUGAAA-3' | First Choice RLM-RACE kit,<br>Thermo Fisher Scientific, Inc. |
| 5'-RACE outer primer        | 5'-GCTGATGGCGATGAATGAACACTG-3'                          | First Choice RLM-RACE kit,<br>Thermo Fisher Scientific, Inc. |
| 5'-RACE inner primer        | 5'-CGCGGATCCGAACACTGCGTTTGCT<br>GGCTTTGATG-3'           | First Choice RLM-RACE kit,<br>Thermo Fisher Scientific, Inc. |
| Gene-specific outer primer  | 5'-ATTTCATCCTGATGCATACATGGTCT-3'                        | The present study                                            |
| Gene-specific inner primer  | 5'-TCGGACAAGTGATGACTCGTGAACA-3'                         | The present study                                            |
| C, Northern blotting probes |                                                         |                                                              |
| 4933-F                      | 5'-TAACCCAATGAGTTCACCA-3'                               | The present study                                            |
| 4933-R                      | 5'-TGTCAATCTATTAGAGCAAGC-3'                             | The present study                                            |

PCREf, *walR* antisense-specific primer; ASEf, *walR* sense-specific primer; 5'-RACE, 5'-rapid amplification of cDNA ends; F, forward; R, reverse.
